# Supplementary material for: Bayesian modeling of plant drought resistance pathway
Source: BMC Plant Biol. 2019 Mar 12;19:96. doi: 10.1186/s12870-019-1684-3 (PMC6417252; doi:10.1186/s12870-019-1684-3)
Supplement: Supplementary file 8 — Excel file containing the data used from dataset GSE46365 to support the conclusion of this article.The complete dataset can be publicly accessed online from NCBI GEO database with the accession number of GSE46365. (XLSX 9.89 kb) [file 12870_2019_1684_MOESM8_ESM.xlsx]

## Sheet: Sheet1
WRK40	WRKY18	WRKY60	RD29A
-2.11817	0.341969	-0.421564	1.58567
-1.19284	1.04395	-0.252518	1.28329
-1.48046	0.510798	-0.424429	1.88924
2.58751	2.43955	0.0756531	3.60619
2.76372	2.12254	-0.124268	4.19876
1.53869	1.57018	-0.146604	4.00022
-0.421134	0.923858	0.638016	5.12957
-2.12531	0.00640011	0.067647	5.94574
-1.75286	0.719815	0.611372	5.41691
-1.3507	0.496238	0.185144	6.31639
-1.14054	3.25546	0.211276	6.86801
-0.243031	1.15765	0.261759	6.48626
-1.9364	0.787153	-0.0709944	1.23005
-1.73202	0.7587	0.231524	0.651116
-1.23958	0.968179	0.193378	0.714448
2.55693	2.487	0.303083	3.76321
2.29155	2.27205	0.25629	3.52151
1.44876	2.02207	0.392169	3.37321
-2.736	-0.454638	0.500885	5.3536
-2.52189	-0.0952482	0.818737	5.5925
0.796473	0.593059	0.984658	4.88536
-1.44392	-0.569368	0.114283	5.77811
-1.07412	0.405672	0.392315	6.2922
-0.633922	0.633405	0.535141	6.53866
